# Supplementary material
Source: PubMed Central journal article supplement (PMC2696328)
Supplement: kfp089_1.pdf [file kfp089_1.pdf]

**Supplemental Table 1: Genes that were commonly regulated by HPTE in FSH- and cAMP-treated granulosa cells.**

| <b>Gene Title</b>                                | <b>Gene Symbol</b> | <b>Annotation<sup>i</sup></b>                                                                                                                                                       | <b>Entrez</b> |
|--------------------------------------------------|--------------------|-------------------------------------------------------------------------------------------------------------------------------------------------------------------------------------|---------------|
| activating transcription factor 5                | Atf5               | Anti-apoptosis; regulation of transcription from RNA polymerase II promoter; regulation of cell cycle and regulation of cell proliferation.                                         | 282840        |
| amplified in osteosarcoma                        | Os9                | Protein binding.                                                                                                                                                                    | 362891        |
| angiopoietin-like 4                              | Angptl4            | Signal transduction; multicellular organismal development; negative regulation of lipoprotein lipase.                                                                               | 362850        |
| ankyrin 2, neuronal                              | Ank2               | Paranodal junction assembly; nervous system development; response to methylmercury; lipid raft; plasma membrane; synaptosome; cytoskeleton; structural constituent of cytoskeleton. | 362036        |
| beta galactoside alpha 2,6 sialyltransferase 2   | St6gal2            | Carbohydrate metabolic process; protein amino acid glycosylation; oligosaccharide metabolic process membrane; integral to Golgi membrane; Golgi apparatus.                          | 301155        |
| C1q and tumor necrosis factor related protein 5  | C1qtnf5            | Phosphate transport; extracellular region; cytoplasm.                                                                                                                               | 315598        |
| carbohydrate (chondroitin synthase 1 (predicted) | Chsy1_predicted    |                                                                                                                                                                                     | 292999        |
| Ceruloplasmin                                    | Cp                 | Plasma membrane copper ion transport; response to nutrient; aging; cellular iron ion homeostasis; anchored to plasma membrane.                                                      | 24268         |
| connective tissue growth factor                  | Ctgf               | cartilage condensation; cell differentiation; angiogenesis; angiogenesis; regulation of cell growth; fibroblast growth factor receptor signaling pathway.                           | 64032         |
| cystatin B                                       | Cstb               | Adult locomotory behavior; regulation of apoptosis; cysteine protease inhibitor activity.                                                                                           | 25308         |
| D-dopachrome tautomerase                         | Ddt                | Melanin biosynthetic process from tyrosine; inflammatory response; dopachrome decarboxylase activity; dopachrome isomerase activity.                                                | 29318         |
| death-associated protein                         | Dap                | Apoptosis.                                                                                                                                                                          | 64322         |
| EH-domain containing 2                           | Ehd2               | Cortical actin cytoskeleton organization and biogenesis; cortical actin cytoskeleton organization and biogenesis;.                                                                  | 361512        |
| enolase 2, gamma, neuronal                       | Eno2               | Glycolysis; phosphopyruvate hydratase complex; lyase activity; phosphopyruvate hydratase activity; magnesium ion binding; phosphopyruvate hydratase activity.                       | 24334         |

|                                                                |           |                                                                                                                                                                          |        |
|----------------------------------------------------------------|-----------|--------------------------------------------------------------------------------------------------------------------------------------------------------------------------|--------|
| family with sequence similarity 20, member C                   | Fam20c    |                                                                                                                                                                          | 304334 |
| family with sequence similarity 82, member C                   | Fam82c    | Cell differentiation; apoptosis cytoplasm; mitochondrion; mitochondrial membrane; integral to membrane.                                                                  | 311328 |
| Fc receptor, IgG, low affinity III                             | Fcgr3     | Positive regulation of type I hypersensitivity; positive regulation of type III hypersensitivity; phagocytosis, cell surface receptor linked signal transduction.        | 116591 |
| FIG4 homolog (S. cerevisiae)                                   | Fig4      |                                                                                                                                                                          | 309855 |
| GLI pathogenesis-related 2                                     | Glpr2     |                                                                                                                                                                          | 679819 |
| glycophorin C (Gerbich blood group)                            | Gypc      |                                                                                                                                                                          | 364837 |
| glypican 3                                                     | Gpc3      | Ureteric bud branching; negative regulation of cell proliferation; positive regulation of BMP signaling pathway; negative regulation of growth; anchored to membrane.    | 25236  |
| Granulin                                                       | Grn       | Positive regulation of epithelial cell proliferation; blastocyst hatching; lipid catabolic process; embryo implantation; phospholipid metabolic process.                 | 29143  |
| GTP binding protein 2                                          | Gtpbp2    |                                                                                                                                                                          | 363195 |
| guanylate nucleotide binding protein 2                         | Gbp2      | Immune response; GTPase activity; GTP binding.                                                                                                                           | 171164 |
| histone cluster 2, H2be                                        | Hist2h2be | Protein binding.                                                                                                                                                         | 295274 |
| histone deacetylase 2                                          | Hdac2     | Histone deacetylation; replication fork; nucleus; heterochromatin; enzyme binding; histone deacetylase activity; transcription factor activity.                          | 84577  |
| HtrA serine peptidase 1                                        | Htra1     | negative regulation of transforming growth factor beta receptor signaling pathway; regulation of cell growth; proteolysis; negative regulation of BMP signaling pathway. | 65164  |
| human immunodeficiency virus type I enhancer binding protein 2 | Hivep2    | Transcription; regulation of transcription, DNA-dependent; zinc ion binding; DNA binding.                                                                                | 29721  |
| immediate early response 3                                     | Ier3      | Antigen processing and presentation of peptide antigen via MHC class I; antigen processing and presentation; immune response; MHC class I protein complex.               | 294235 |
| insulin-like growth factor binding protein 5                   | Igfbp5    | Skeletal muscle growth; regulation of cell growth; intracellular signaling cascade; extracellular region; insulin-like growth factor binding.                            | 25285  |
| integrin beta 1 (fibronectin receptor beta)                    | Itgb1     | Regulation of G-protein coupled receptor protein signaling pathway; cell adhesion; integrin-                                                                             | 24511  |

|                                                                                        |                      |                                                                                                                                                                                  |        |
|----------------------------------------------------------------------------------------|----------------------|----------------------------------------------------------------------------------------------------------------------------------------------------------------------------------|--------|
|                                                                                        |                      | mediated signaling pathway; cell-matrix adhesion; sarcomere organization.                                                                                                        |        |
| interferon regulatory factor 6 (predicted)                                             | Irf6_predicted       | Biological process; skin development; negative regulation of cell proliferation; keratinocyte differentiation; cell development; keratinocyte proliferation; cellular component. | 364081 |
| interleukin 17 receptor E                                                              | Il17re               | Membrane; integral to membrane; receptor activity.                                                                                                                               | 362417 |
| IQ motif containing GTPase activating protein 1 (predicted)                            | Iqgap1_predicted     | Cytoplasm; leading edge; protein complex; neuron projection; protein complex binding.                                                                                            | 361598 |
| kinesin family member 15                                                               | Kif15                | Microtubule-based movement; microtubule associated complex; growth factor activity; ATP binding; GTPase activator activity; microtubule motor activity.                          | 353302 |
| lamin A                                                                                | Lmna                 | Nuclear membrane organization and biogenesis; spermatogenesis; nuclear matrix; lamin filament; intermediate filament.                                                            | 60374  |
| LOC363015 (predicted)                                                                  | RGD1310444_predicted |                                                                                                                                                                                  | 363015 |
| lysosomal membrane glycoprotein 1                                                      | Lamp1                | Autophagy; lysosomal membrane; endosome; late endosome; melanosome; external side of plasma membrane; endosome membrane.                                                         | 25328  |
| mannosidase 1, alpha (predicted)                                                       | Man1a_predicted      | ER-Golgi intermediate compartment; Golgi membrane; membrane; mannosyl-oligosaccharide 1,2-alpha-mannosidase activity; calcium ion binding.                                       | 294410 |
| N-acetylneuraminatase pyruvate lyase                                                   | Npl                  | Metabolic process; carbohydrate metabolic process; cytoplasm; lyase activity; N-acetylneuraminatase lyase activity.                                                              | 304860 |
| N-terminal asparagine amidase                                                          | Ntan1                | Memory; adult locomotory behavior; hydrolase activity; protein N-terminal asparagine amidohydrolase activity.                                                                    | 360462 |
| potassium voltage gated channel, Shal-related family, member 2                         | Kcnd2                | Potassium ion transport; regulation of action potential; protein heterooligomerization; cell surface; voltage-gated potassium.                                                   | 65180  |
| profilin 2                                                                             | Pfn2                 | Regulation of actin filament polymerization; actin cytoskeleton organization and biogenesis; actin cytoskeleton.                                                                 | 81531  |
| protective protein for beta-galactosidase                                              | Ppqb                 | Proteolysis; cellular component; molecular function; serine carboxypeptidase activity.                                                                                           | 296370 |
| protein phosphatase 1, regulatory (inhibitor subunit 14B)                              | Ppp1r14b             | Regulation of phosphorylation cytoplasm; protein phosphatase type 1 regulator activity; protein phosphatase inhibitor activity; protein binding.                                 | 259225 |
| RAB3B, member RAS oncogene family                                                      | Rab3b                | Peptidyl-cysteine methylation; regulation of exocytosis; protein transport; small GTPase mediated signal transduction; secretory granule; synaptic vesicle.                      | 81755  |
| ral guanine nucleotide dissociation stimulator,-like 1 (predicted)                     | Rgl1_predicted       | Protein binding.                                                                                                                                                                 | 289080 |
| RNA binding motif protein 12                                                           | Rbm12                | Nucleotide binding; nucleic acid binding; protein binding.                                                                                                                       | 652928 |
| S-adenosylhomocysteine hydrolase-like 1 (predicted)                                    | Ahcy1_predicted      |                                                                                                                                                                                  | 362013 |
| SH3 and PX domain containing 3 (predicted)                                             | Sh3px3_predicted     |                                                                                                                                                                                  | 315696 |
| similar to 3632451O06Rik protein (predicted)                                           | RGD1310110_predicted |                                                                                                                                                                                  | 361032 |
| similar to cis-Golgi matrix protein GM130                                              | LOC690485            |                                                                                                                                                                                  | 690485 |
| similar to DNA segment, Chr 4, Brigham & Womens Genetics 0951 expressed                | RGD1308059           |                                                                                                                                                                                  | 362535 |
| similar to GA binding protein transcription factor, beta subunit 2 (GABPB2 (predicted) | RGD1560391_predicted |                                                                                                                                                                                  | 499883 |
| similar to GREB1 protein isoform a (predicted)                                         | RGD1562371_predicted |                                                                                                                                                                                  | 498819 |

|                                                             |                      |                                                                                                                                                                                      |        |
|-------------------------------------------------------------|----------------------|--------------------------------------------------------------------------------------------------------------------------------------------------------------------------------------|--------|
| similar to hypothetical protein FLJ14146                    | RGD1310587           | Integral to membrane; membrane.                                                                                                                                                      | 360894 |
| similar to hypothetical protein MGC17337 (predicted)        | RGD1308165_predicted | Identical protein binding.                                                                                                                                                           | 362516 |
| Similar to RIKEN cDNA 2610019F03                            | LOC498662            |                                                                                                                                                                                      | 498662 |
| similar to T03G11.6                                         | LOC689540            |                                                                                                                                                                                      | 689540 |
| SPARC related modular calcium binding 2 (predicted)         | Smoc2_predicted      |                                                                                                                                                                                      | 292401 |
| syndecan 1                                                  | Sdc1                 | Response to glucocorticoid stimulus; inflammatory response; response to hydrogen peroxide; odontogenesis; cell adhesion; cell-cell signaling; wound healing; response to toxin.      | 25216  |
| taste receptor, type 1, member 2                            | Tas1r2               | response to stimulus; G-protein coupled receptor protein signaling pathway; signal transduction; proline biosynthetic process; sensory perception of sweet taste; metabolic process. | 29408  |
| Tax1 (human T-cell leukemia virus type I binding protein 1) | Tax1bp1              | Anti-apoptosis; intracellular; identical protein binding.                                                                                                                            | 246244 |
| testis expressed gene 14 (predicted)                        | Tex14_predicted      |                                                                                                                                                                                      | 287603 |
| tetratricopeptide repeat domain 6 (predicted)               | Ttc6_predicted       |                                                                                                                                                                                      | 299067 |
| thymosin beta-like protein 1                                | Tmsb1                | Actin cytoskeleton organization and biogenesis; sequestering of actin monomers; cytoplasm; actin binding.                                                                            | 286978 |
| transmembrane and tetratricopeptide repeat containing 4     | Tmtc4                |                                                                                                                                                                                      | 290501 |
| ubiquitin-activating enzyme E1-domain containing 1          | Ube1dc1              | Ubiquitin cycle; metabolic process; cytoplasm; catalytic activity.                                                                                                                   | 300968 |
| vasohibin 1                                                 | Vash1                |                                                                                                                                                                                      | 503052 |
| vasohibin 2                                                 | Vash2                |                                                                                                                                                                                      | 498309 |
| Vesicle amine transport protein 1 homolog (T californica)   | Vat1                 | Metabolic process; oxidoreductase activity; zinc ion binding.                                                                                                                        | 287721 |

<sup>i</sup> Annotation data was collected from Array Track.
